# Supplementary material for: Achieving ultrahigh energy density and excellent stability in carbon pentazole
Source: Royal Society of Chemistry journal article supplement (doi:10.1039/d4ta01837k), 2024-01-01
Supplement: d4ta01837k1.pdf [file d4ta01837k1.pdf]

# Supplementary Information for Achieving Ultrahigh Energy Density and Excellent Stability in Carbon Pentazole

Guanghai Zhang,<sup>a</sup> Wencai Yi,<sup>\*ab</sup> Yiqing Cao,<sup>a</sup> Shengli Zhang,<sup>\*c</sup> and Xiaobing Liu<sup>\*ab</sup>

<sup>a</sup> *Laboratory of High Pressure Physics and Material Science, School of Physics and Physical Engineering, Qufu Normal University, Qufu 273165, China*

<sup>b</sup> *Advanced Research Institute of Multidisciplinary Sciences, Qufu Normal University, Qufu, 273165, China*

<sup>c</sup> *Department of Materials Science and Engineering, Nanjing University of Science and Technology, Nanjing, Jiangsu, 210094 China*

## Corresponding Author

Wencai Yi: [yiwc@qfnu.edu.cn](mailto:yiwc@qfnu.edu.cn)

Shengli Zhang: [zhangslvip@njust.edu.cn](mailto:zhangslvip@njust.edu.cn)

Xiaobing Liu: [xiaobing.phy@qfnu.edu.cn](mailto:xiaobing.phy@qfnu.edu.cn)

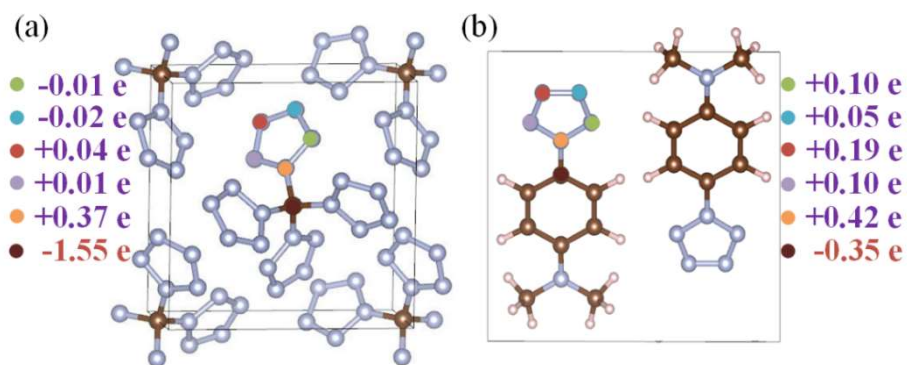

**Fig. S1** The atomic Bader charge transfer of (a) the  $P\bar{4}2_1c$ - $C(N_5)_4$  and (b) the p-dimethylaminophenylpentazole at 35 GPa.

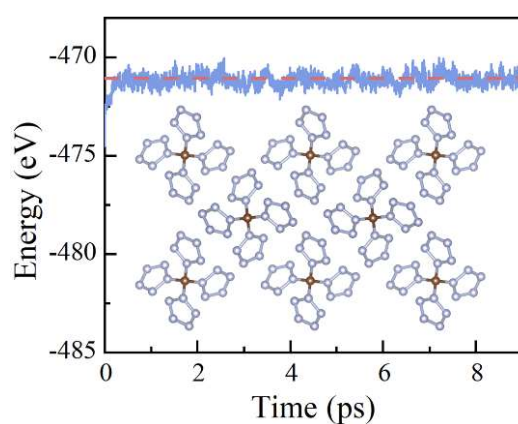

**Fig. S2** Fluctuations of the total energies of  $P\bar{4}2_1c$ - $C(N_5)_4$  in AIMD simulations at 35 GPa and 300 K, the inserted images is the structures at the end of simulations.

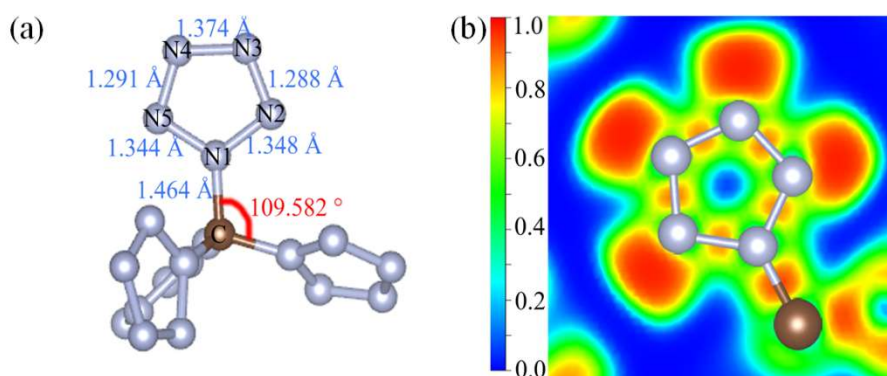

**Fig. S3** Under atmospheric pressure, (a) the bond length and bond angle of C-N and N-N bonds, (b) sectional view of ELF along the C and the  $cyclo-N_5^-$  plane of  $P\bar{4}2_1c$ - $C(N_5)_4$ .

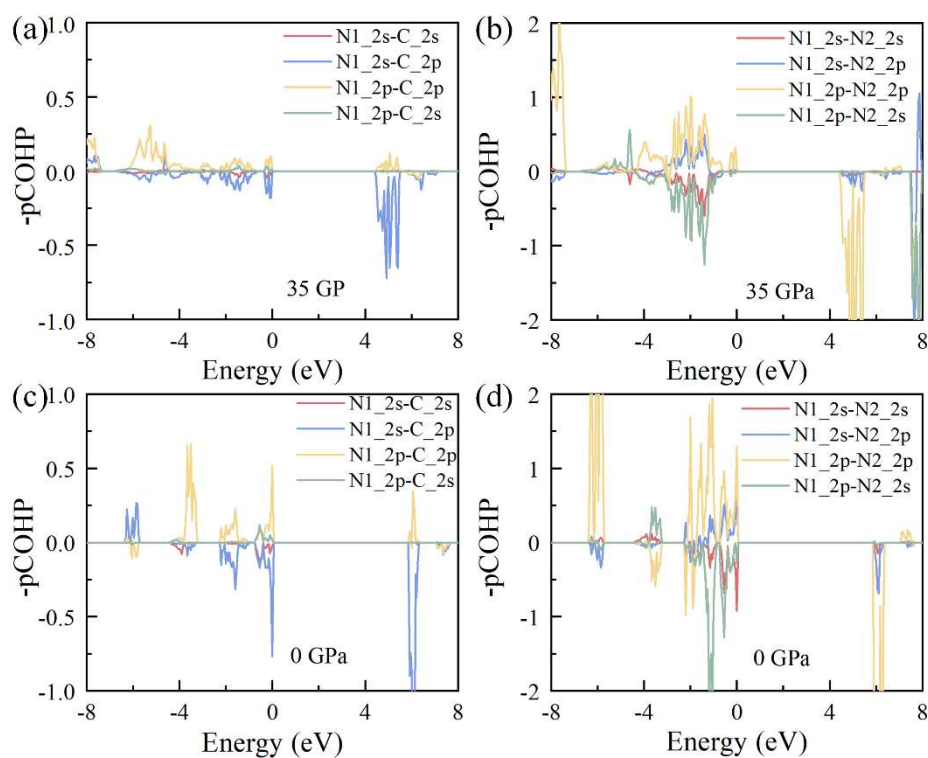

**Fig. S4** The -pCOHP of (a) C-N1 and (b) N1-N2 in the  $P\bar{4}2_1c$ -C(N<sub>5</sub>)<sub>4</sub> under 35GPa, the -pCOHP of (c) C-N1 and (d) N1-N2 in the  $P\bar{4}2_1c$ -C(N<sub>5</sub>)<sub>4</sub> under atmospheric pressure.

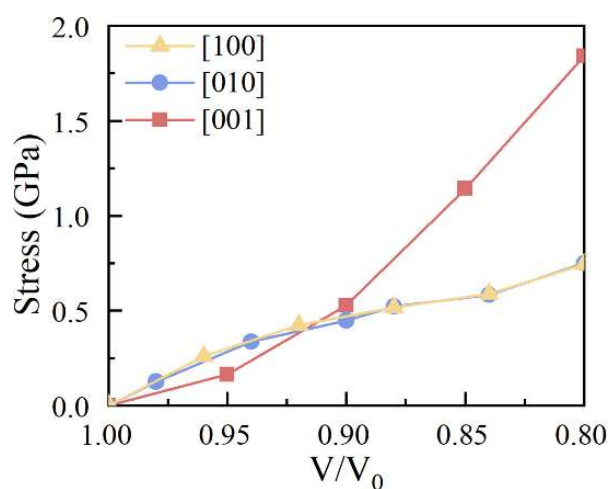

**Fig. S5** Principal stress as function of compression ratio  $V/V_0$  under uniaxial loadings. The results indicate that  $P\bar{4}2_1c$ -C(N<sub>5</sub>)<sub>4</sub> possesses higher volume compression ratio (20%) than that of the known 1-diamino-2,2-dinitroethylene (FOX-7) (~8%).<sup>1</sup>

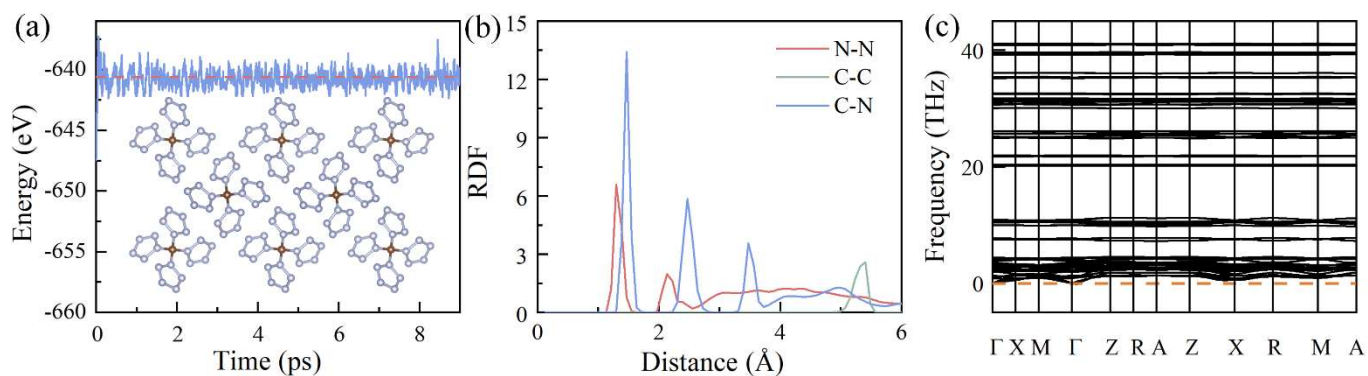

**Fig. S6** Under atmospheric pressure, (a) evolution of total energy as a function of time at 600 K, and snapshots of the final structures of  $P\bar{4}2_1c$ -C(N<sub>5</sub>)<sub>4</sub>; (b) RDF during AIMD simulations at 600 K, (c) phonon spectra of  $P\bar{4}2_1c$ -C(N<sub>5</sub>)<sub>4</sub>.

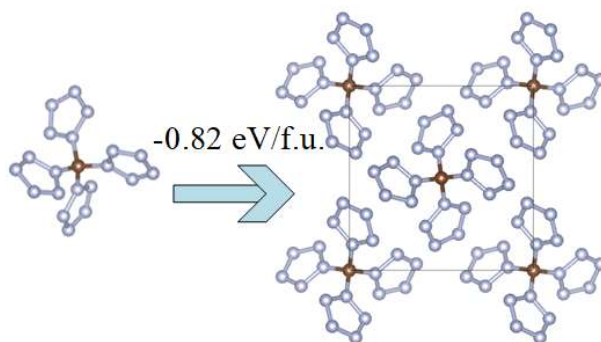

**Fig. S7** Assembling the C(N<sub>5</sub>)<sub>4</sub> single molecules to  $P\bar{4}2_1c$ -C(N<sub>5</sub>)<sub>4</sub> crystal will release energy of 0.82 eV/f.u..

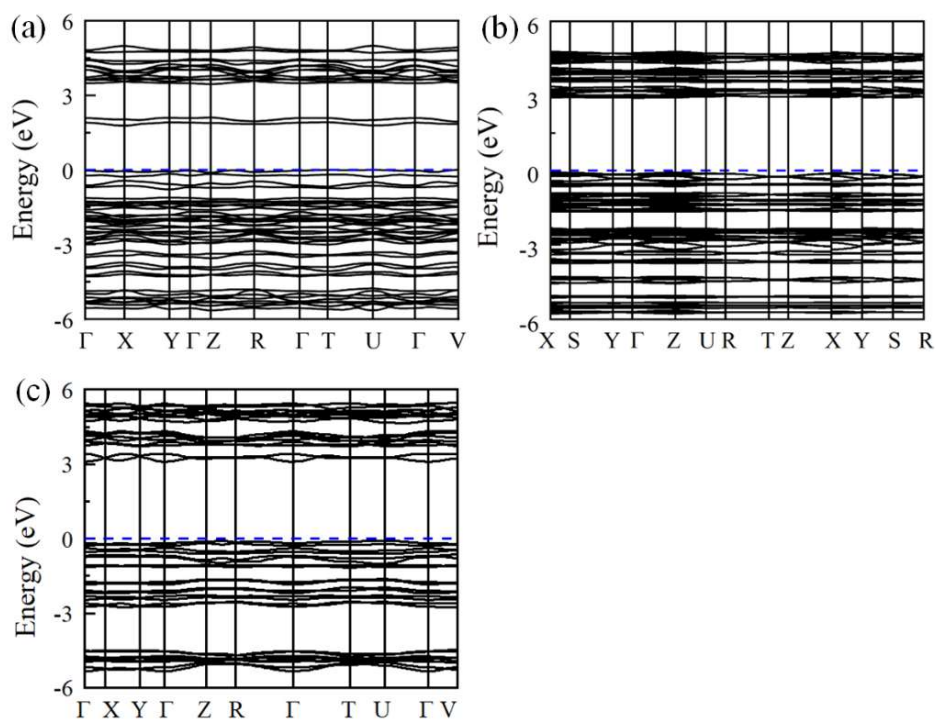

**Fig. S8** Under atmospheric pressure, the band structures of (a)  $P\bar{1}$ - $C_2N_{16}$ , (b)  $Pbcn$ - $C_2N_{14}$  and (c)  $P\bar{1}$ - $C(N_3)_4$ , the calculations are at HSE06 level.

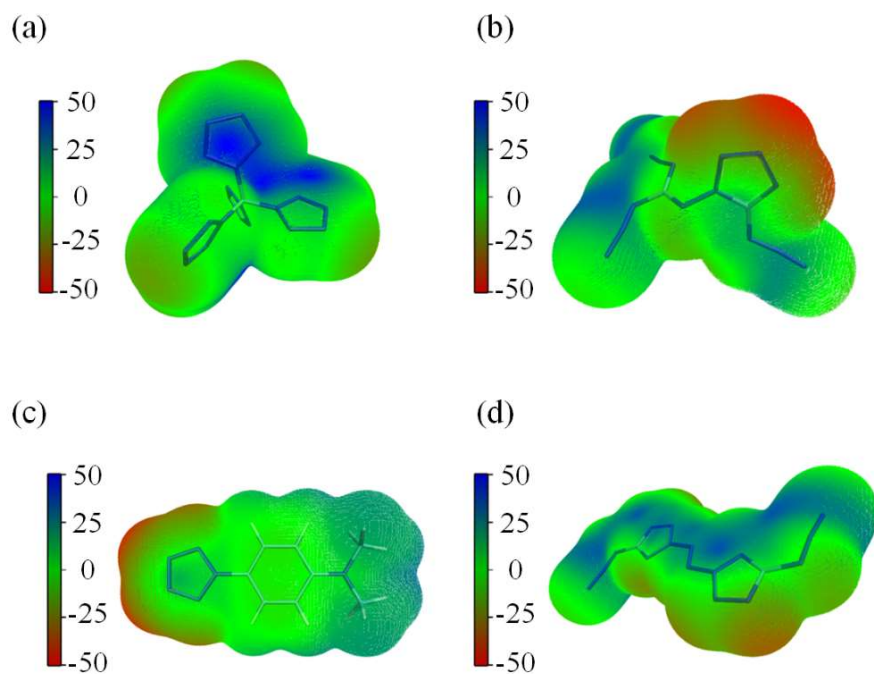

**Fig. S9** Electrostatic potential (ESP) of  $P\bar{4}2_1c$ - $C(N_5)_4$ ,  $Pbcn$ - $C_2N_{14}$ ,  $P\bar{1}$ - $C_2N_{16}$  and  $P2_1/m$ - $C_8N_6H_{10}$ , the unit of error bar is kcal/mol.

**Tab. S1** Heat of formation (HOF) of CN compounds, the known explosives of TNT and HMX.

| Compounds               | HOF (kJ/mol) |
|-------------------------|--------------|
| $P\bar{4}2_1c-C(N_5)_4$ | 2006.69      |
| $P\bar{1}-C_2N_{16}$    | 1700.70      |
| $Pbcn-C_2N_{14}$        | 1495.00      |
| $P\bar{1}-C(N_3)_4$     | 1293.20      |
| TNT                     | -63.12       |
| HMX                     | 102.41       |

## References

1. Y. Su, J. Fan, Z. Zheng and J. Zhao, *Prog. Nat. Sci.*, 2019, **29**, 329-334.
